# Supplementary material for: Reduced Temperature Sensitivity of Maximum Latewood Density Formation in High-Elevation Corsican Pines under Recent Warming
Source: MDPI journal article supplement (doi:10.3390/atmos12070804), 2021-06-22
Supplement: s1 [file s1]

Archive with 1 entries (1 files):
- atmosphere-1255462-supplementary.pdf
